# Supplementary material for: Detection of Zak phases and topological invariants in a chiral quantum walk of twisted photons
Source: PubMed Central journal article supplement (PMC5501976; doi:10.1038/ncomms15516), 2017-06-01
Supplement: ncomms15516-s2.pdf [file ncomms15516-s2.pdf]

**Editorial Note:** this manuscript has been previously reviewed at another journal that is not operating a transparent peer review scheme. This document only contains reviewer comments and rebuttal letters for versions considered at Nature Communications.
